# Supplementary material for: Optimizing the NRR activity of single and double boron atom catalysts using a suitable support: a first principles investigation
Source: Royal Society of Chemistry journal article supplement (doi:10.1039/d3cp02358c), 2023-01-01
Supplement: d3cp02358c1.pdf [file d3cp02358c1.pdf]

## Supporting information for

### Optimizing the NRR activity of single and double boron atom catalysts using suitable support: A first principles investigation

Anjumun Rasool <sup>a</sup>, Insha Anis <sup>a</sup>, Sajad Ahmad Bhat <sup>a</sup> and Manzoor Ahmad Dar<sup>a\*</sup>

<sup>a</sup> Department of Chemistry, Islamic University of Science and Technology, Awantipora, Jammu and Kashmir-192122, India

#### Table of contents

1. Fig. S1. Free energy profile for NRR on B<sub>1</sub>@graphene along alternating, distal and enzymatic pathway.....S3
2. Fig. S2. Free energy profile for NRR on B<sub>1</sub>@GaN, B<sub>1</sub>@MoS<sub>2</sub>, and B<sub>1</sub>@g-C<sub>3</sub>N<sub>4</sub> along alternating and distal pathway .....S3 and S4
3. Fig. S3. Free energy profile for NRR on B<sub>2</sub>@graphyne and B<sub>2</sub>@MoS<sub>2</sub> catalysts along alternating and distal pathway.....S4
4. Fig. S4. Free energy profile for NRR on B<sub>2</sub>@graphene catalyst along alternating, distal and enzymatic.....S5
5. Fig. S5. Free energy profile for NRR on B<sub>1</sub>@graphene, B<sub>2</sub>@graphene, B<sub>1</sub>@g-C<sub>3</sub>N<sub>4</sub> and B<sub>2</sub>@g-C<sub>3</sub>N<sub>4</sub> catalyst along consecutive pathway.....S5
6. Fig. S6. Optimized truncated side views of NRR intermediates on B<sub>1</sub>@GaN and B<sub>1</sub>@MoS<sub>2</sub> catalysts along alternating and distal pathways. Green and red coloured arrows indicate alternating and distal pathway respectively..... S6
7. Fig. S7. Optimized truncated side views of NRR intermediates on B<sub>1</sub>@g-C<sub>3</sub>N<sub>4</sub> and B<sub>1</sub>@graphene catalysts along alternating, distal and enzymatic pathways. Green red and cyan coloured arrows indicate alternating and distal pathway respectively..... S6
8. Fig. S8. Optimized truncated side views of NRR intermediates on B<sub>2</sub>@graphyne and B<sub>2</sub>@MoS<sub>2</sub> catalyst along alternating and distal pathways.....S7
9. Fig. S9. Optimized truncated side views of NRR on B<sub>2</sub>@g-C<sub>3</sub>N<sub>4</sub> catalyst along enzymatic pathway.....S7
10. Fig. S10. Optimized truncated side views of NRR intermediates on B<sub>2</sub>@graphene catalyst along alternating, distal and enzymatic pathways.....S7
11. Fig. S11. Optimized truncated side views of NRR intermediates on (a)B<sub>1</sub>@graphene (b) B<sub>2</sub>@graphene (c) B<sub>1</sub>@g-C<sub>3</sub>N<sub>4</sub> and (d) B<sub>2</sub>@ g-C<sub>3</sub>N<sub>4</sub> catalysts along consecutive pathway.....S8
12. Fig. S12. Variations of energy versus the AIMD simulation time for B<sub>2</sub>@g-C<sub>3</sub>N<sub>4</sub>.....S9
13. Fig. S13. Dissociation barrier for the double boron atom catalysts supported on the g-C<sub>3</sub>N<sub>4</sub> monolayer.....S9
14. Fig. S14. Calculated adsorption free energies of N<sub>2</sub> molecule and H atom on the single and double boron atom adsorbed on GaN, graphene, g-C<sub>3</sub>N<sub>4</sub>, MoS<sub>2</sub> and graphyne supports.....S10

15. Table S1. Energy, ZPE, TS, G and  $\Delta G$  of reaction steps of NRR on  $B_1@GaN$  and  $B_1@MoS_2$  along alternating and distal pathway.....**S10 and S11**
16. Table S2. Energy, ZPE, TS, G and  $\Delta G$  of reaction steps of NRR on  $B_1@graphene$  and  $B_1@g-C_3N_4$  along alternating, distal and enzymatic pathway..... **S11 and S12**
17. Table S3. Energy, ZPE, TS, G and  $\Delta G$  of reaction steps of NRR on  $B_2@MoS_2$  and  $B_2@graphyne$  along alternating, and distal pathway..... **S13 and S14**
18. Table S4. Energy, ZPE, TS, G and  $\Delta G$  of reaction steps of NRR on  $B_2@g-C_3N_4$  along Enzymatic pathway.....**S14**
19. Table S5. Energy, ZPE, TS, G and  $\Delta G$  of reaction steps of NRR on  $B_2@graphene$  along alternating, distal and enzymatic pathway.....**S14 and S15**
20. Table S6. Energy, ZPE, TS, G and  $\Delta G$  of reaction steps of NRR on  $B_1@graphene$ ,  $B_2@graphene$ ,  $B_1@g-C_3N_4$  and  $B_2@g-C_3N$  catalysts along consecutive pathway..**S15 and S16**

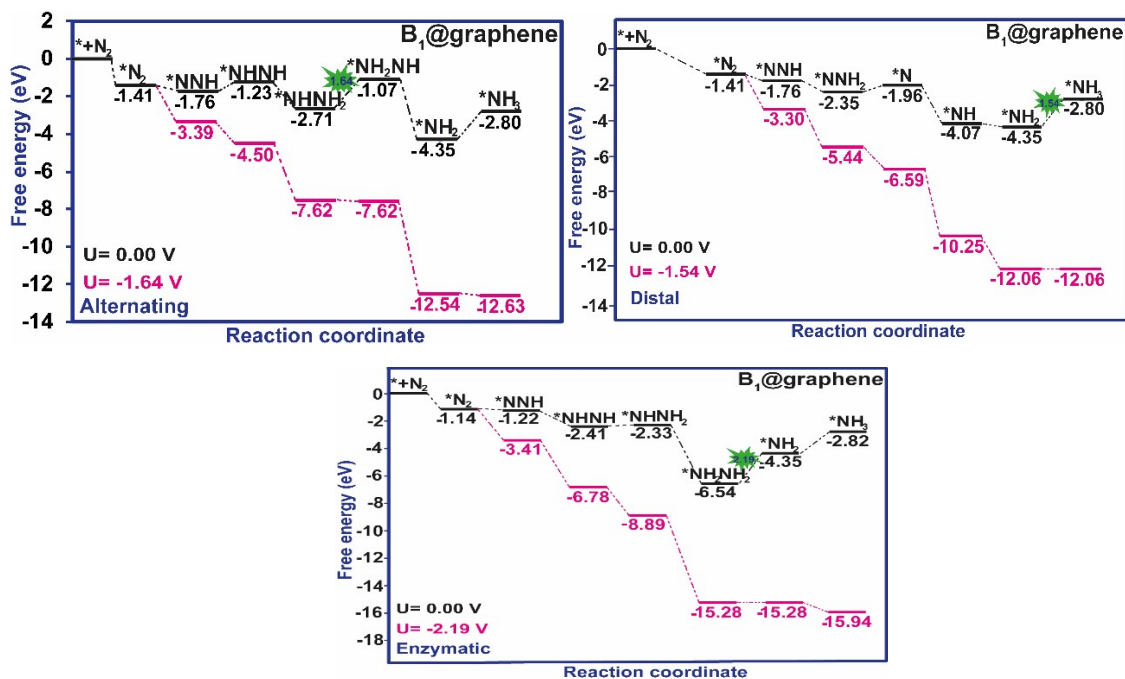

**Fig. S1.** Free energy profile for NRR on  $B_1@graphene$  along alternating, distal and enzymatic pathways.

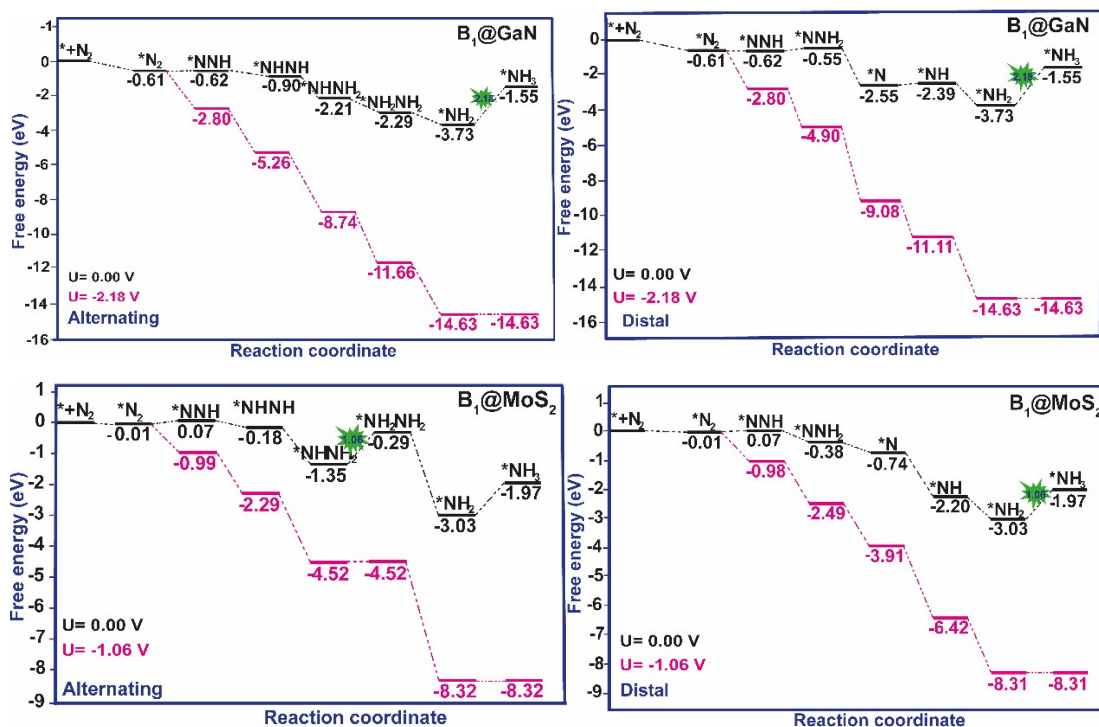

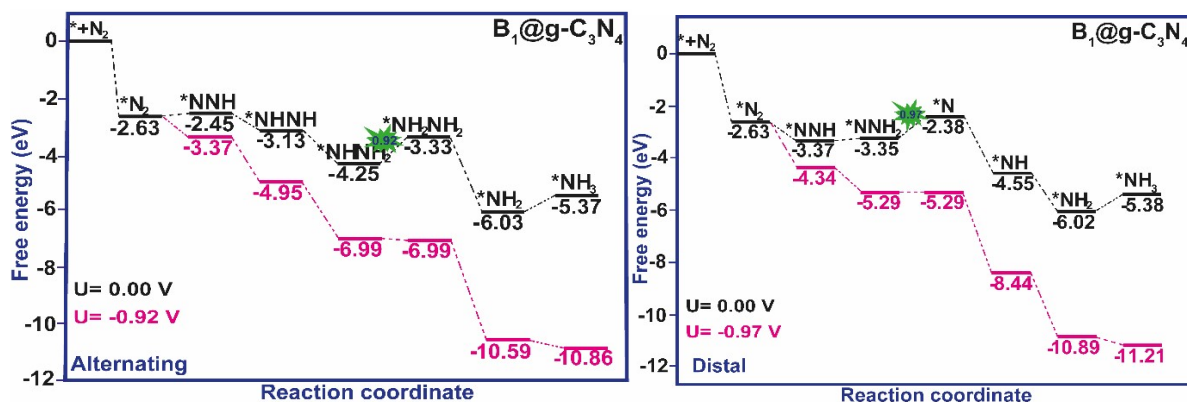

**Fig. S2.** Free energy profile for NRR on  $B_1@GaN$ ,  $B_1@MoS_2$ , and  $B_1@g-C_3N_4$  along alternating and distal pathways.

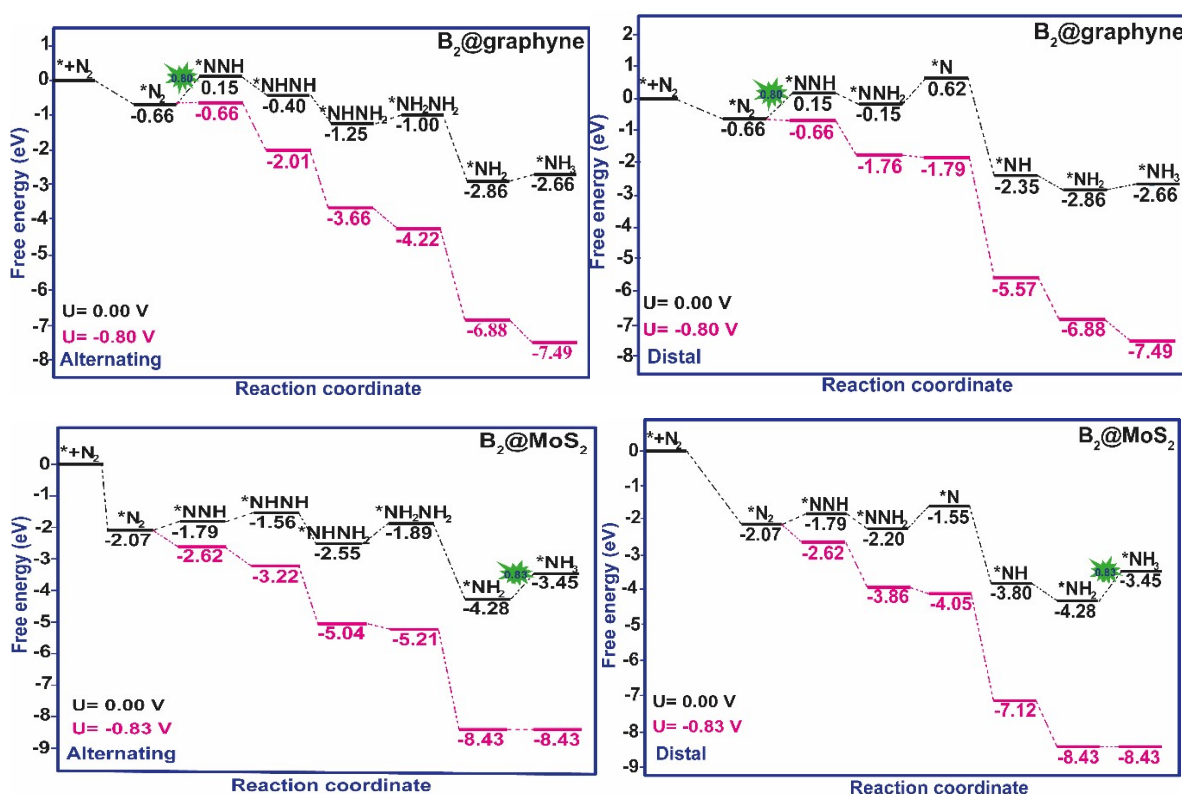

**Fig. S3.** Free energy profile for NRR on  $B_2@graphyne$  and  $B_2@MoS_2$  catalysts along alternating and distal pathways.

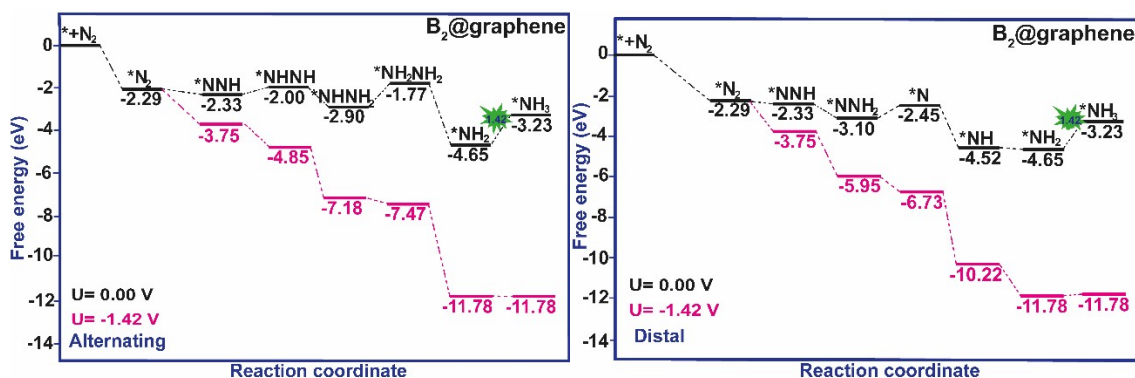

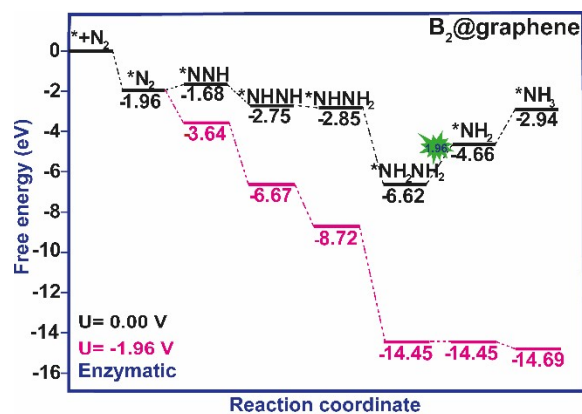

**Fig. S4.** Free energy profile for NRR on  $B_2@graphene$  catalyst along alternating, distal and enzymatic pathways.

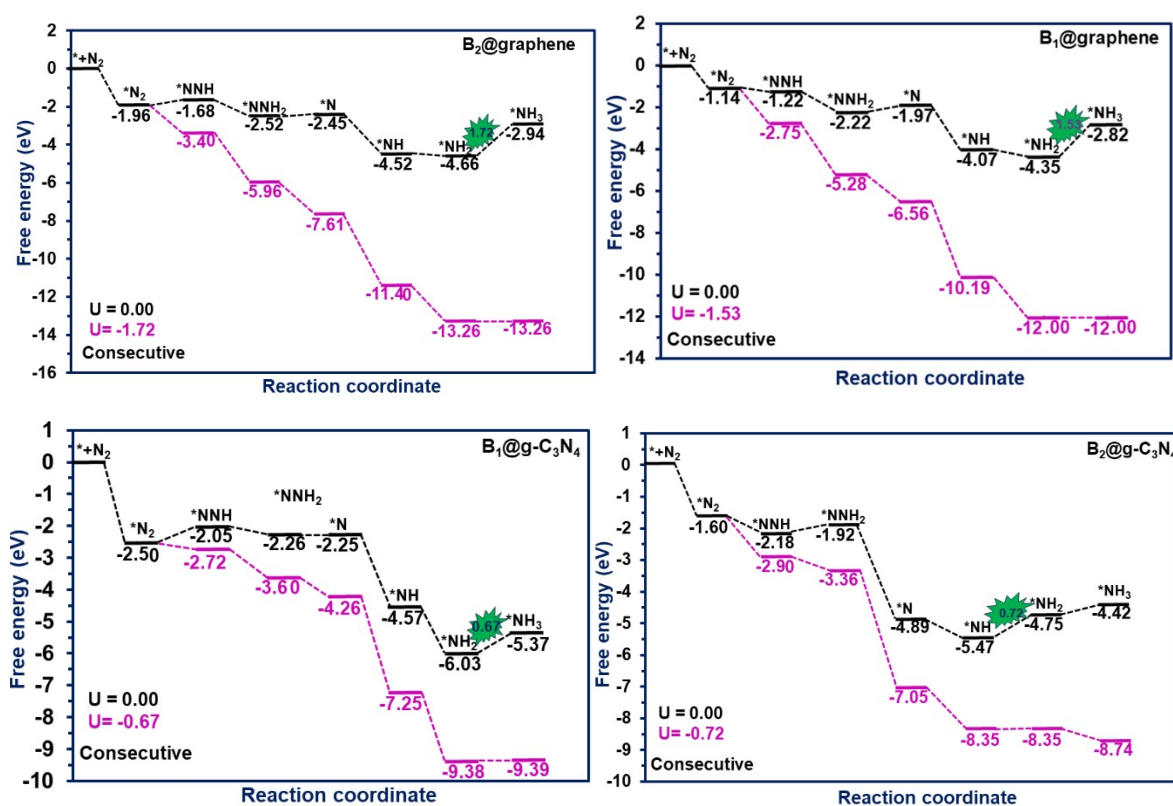

**Fig. S5.** Free energy profile for NRR on  $B_1@graphene$ ,  $B_2@graphene$ ,  $B_1@g-C_3N_4$  and  $B_2@g-C_3N_4$  catalyst along Consecutive pathway.

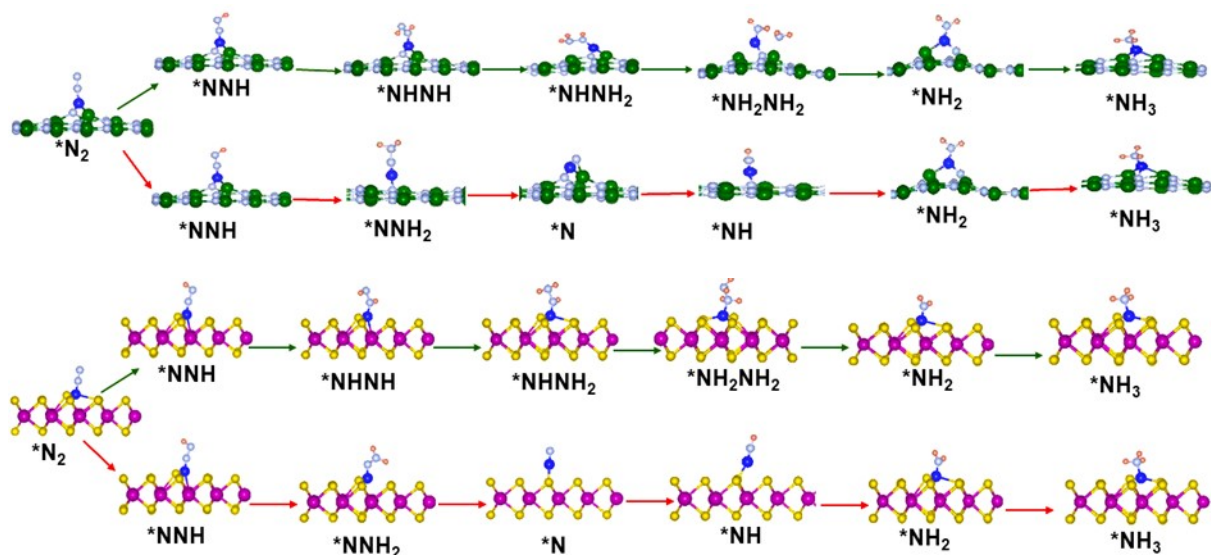

**Fig. S6.** Truncated side views of the optimized NRR intermediates on  $B_1@GaN$  and  $B_1@MoS_2$  catalysts along alternating and distal pathways. Green and red coloured arrows indicate alternating and distal pathway respectively.

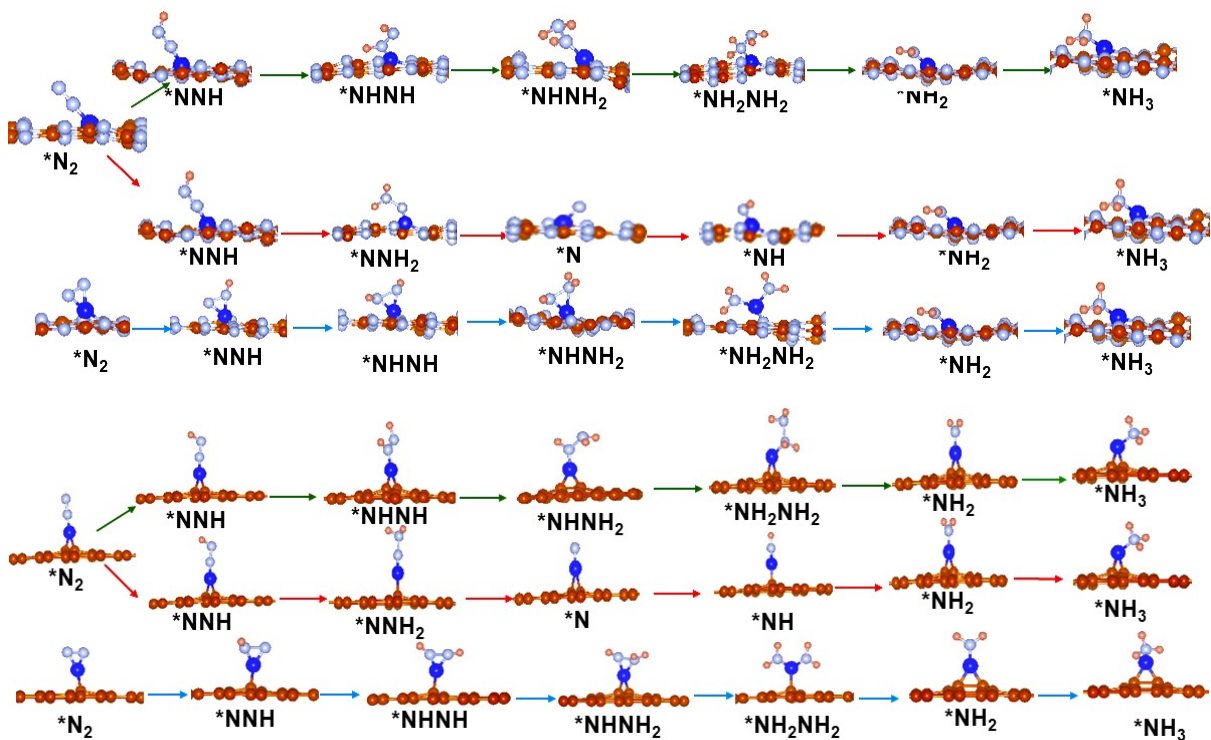

**Fig. S7.** Truncated side views of the optimized NRR intermediates on  $B_1@g-C_3N_4$  and  $B_1@graphene$  catalysts along alternating, distal and enzymatic pathways. Green, red and cyan coloured arrows indicate alternating, distal and enzymatic pathway respectively.

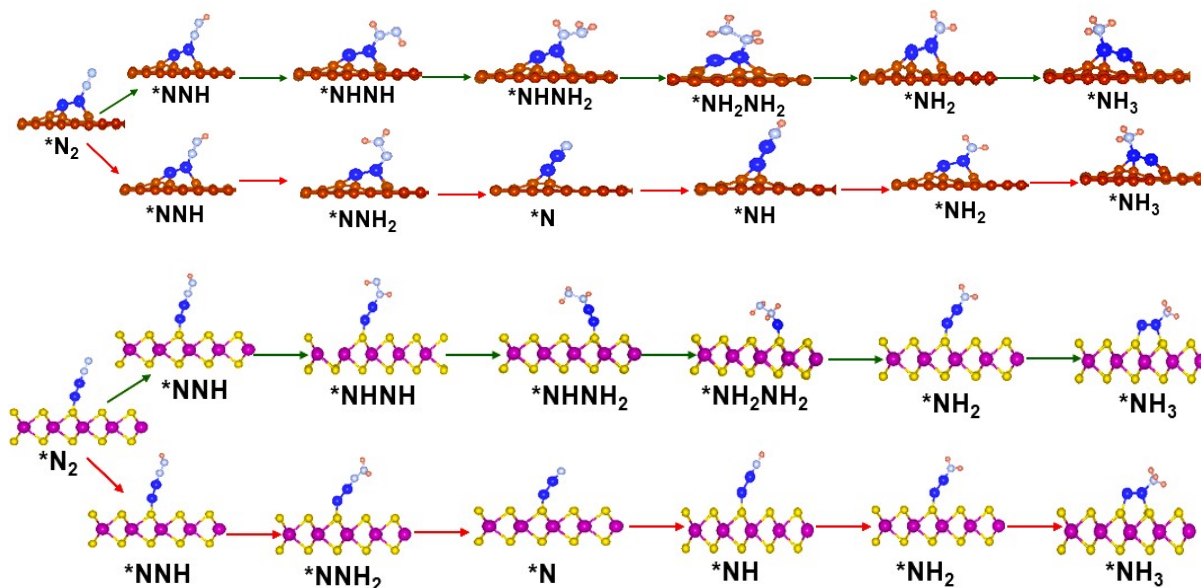

**Fig. S8.** Truncated side views of the optimized NRR intermediates on  $B_2@graphyne$  and  $B_2@MoS_2$  catalysts along alternating and distal pathways. Green and red coloured arrows indicate alternating and distal pathway respectively.

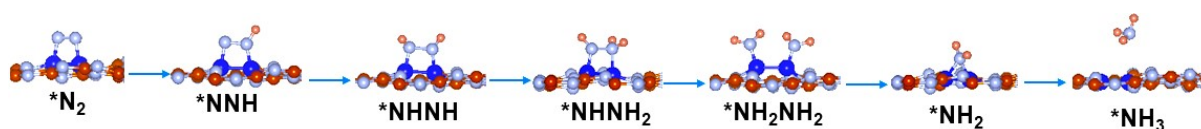

**Fig. S9.** Truncated side views of the optimized NRR intermediates on  $B_2@g-C_3N_4$  catalyst along enzymatic pathway. Cyan coloured arrow indicates enzymatic pathway.

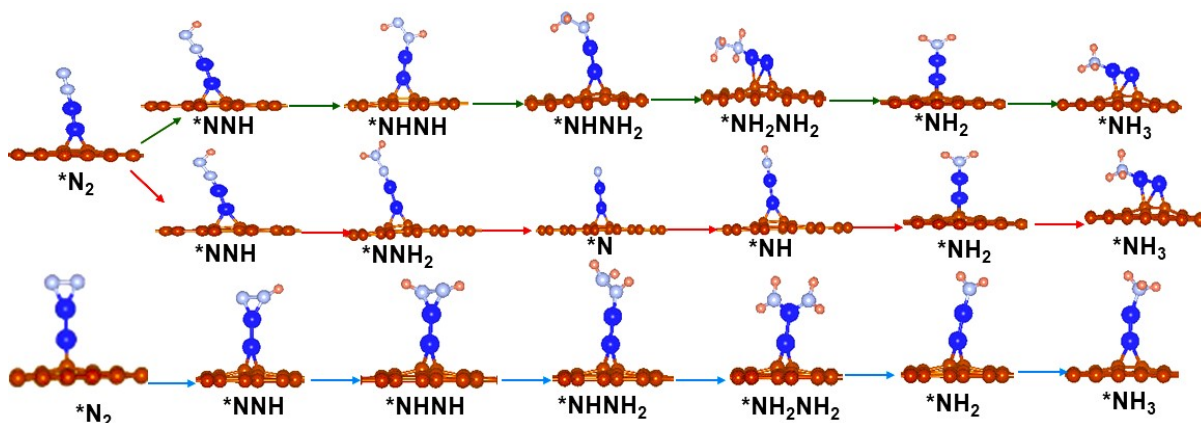

**Fig. S10.** Truncated side views of the optimized NRR intermediates on  $B_2@graphene$  catalyst along alternating, distal and enzymatic pathways. Green, red and cyan coloured arrows indicate alternating, distal, and enzymatic pathway respectively.

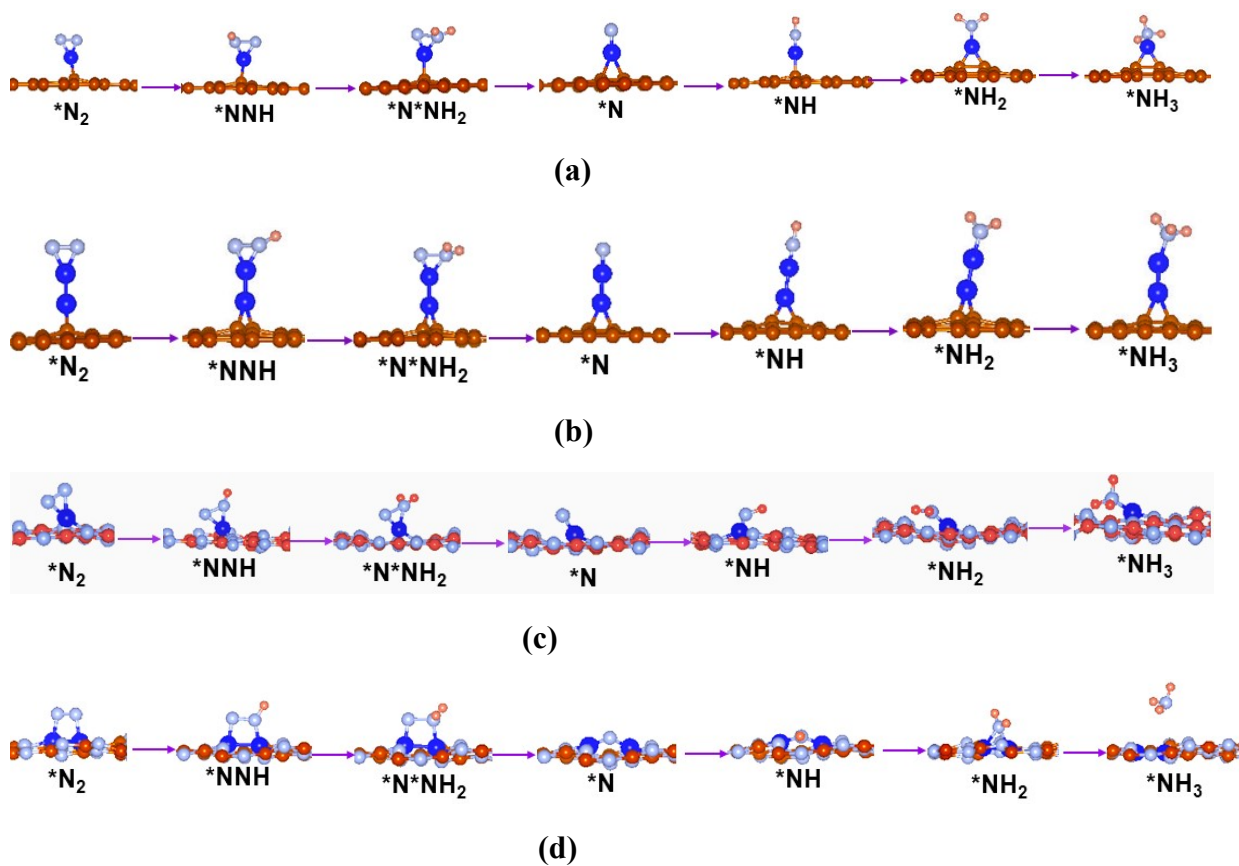

**Fig. S11.** Truncated side views of the optimized NRR intermediates on (a)  $B_1@graphene$  (b)  $B_2@graphene$  (c)  $B_1@g-C_3N_4$  and (d)  $B_2@g-C_3N_4$  catalysts along consecutive pathway.



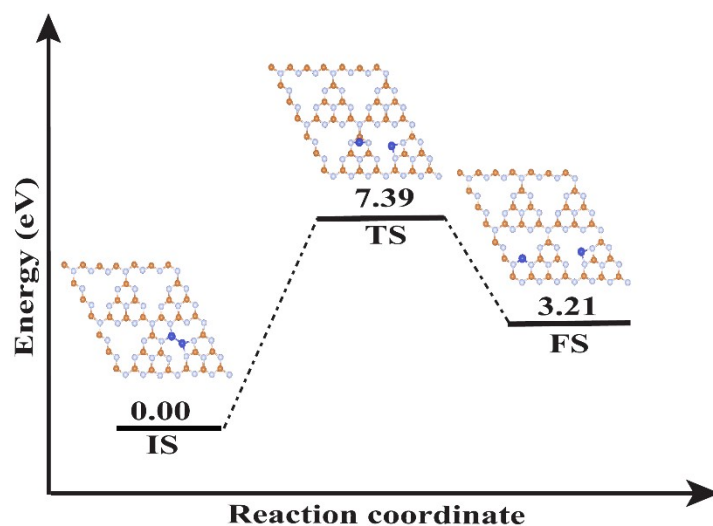

**Fig. S12.** Dissociation barrier for the double boron atom catalysts supported on the  $g\text{-C}_3\text{N}_4$  monolayer as obtained from nudged elastic band calculations.

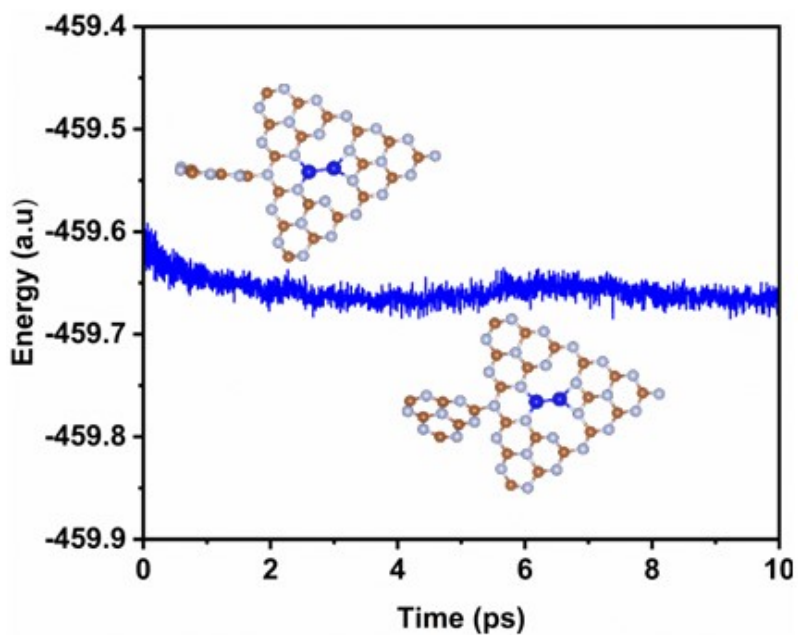

**Fig. S13.** Variations of energy versus the AIMD simulation time for  $\text{B}_2@g\text{-C}_3\text{N}_4$  at 350 K.

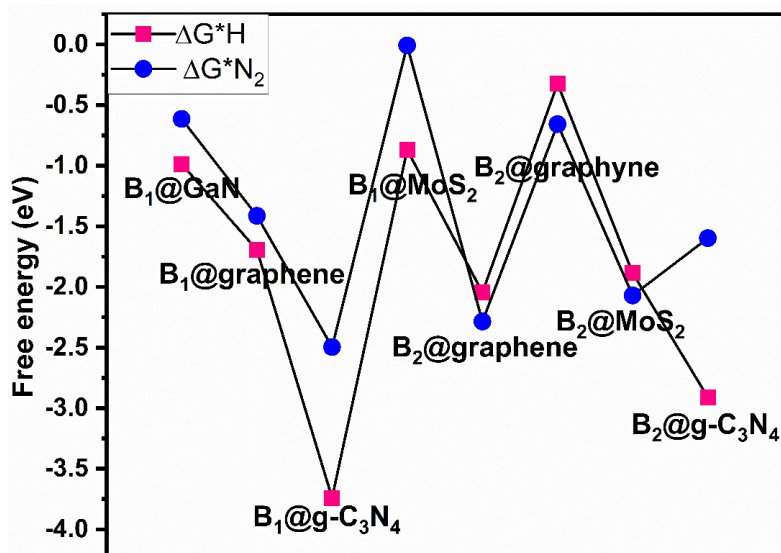

**Fig. S14.** Calculated adsorption free energies of  $N_2$  molecule and H atom on the single and double boron atom adsorbed on GaN, graphene,  $g-C_3N_4$ ,  $MoS_2$  and graphyne supports.

**Table S1.** Energy, ZPE, TS, G and  $\Delta G$  of reaction steps of NRR on  $B_1@GaN$  and  $B_1@MoS_2$  along alternating and distal pathway.

#### Alternating NRR pathway on $B_1@GaN$

| Reaction step                    | Energy  | ZPE  | TS   | G       | $\Delta G$ |
|----------------------------------|---------|------|------|---------|------------|
| * $N_2$                          | -310.65 | 0.21 | 0.15 | -310.59 | -0.61      |
| *NNH                             | -314.24 | 0.52 | 0.16 | -313.88 | -0.62      |
| C*NHNH                           | -318.13 | 0.84 | 0.16 | -317.44 | -0.90      |
| *NHNH <sub>2</sub>               | -323.10 | 1.20 | 0.13 | -322.03 | -2.21      |
| *NH <sub>2</sub> NH <sub>2</sub> | -327.25 | 1.37 | 0.17 | -326.05 | -2.94      |
| *NH <sub>2</sub>                 | -311.97 | 0.73 | 0.09 | -311.33 | -3.73      |
| *NH <sub>3</sub>                 | -313.37 | 1.05 | 0.11 | -312.43 | -1.55      |

#### Distal NRR pathway on $B_1@GaN$

| Reaction step     | Energy  | ZPE  | TS   | G       | $\Delta G$ |
|-------------------|---------|------|------|---------|------------|
| * $N_2$           | -310.65 | 0.21 | 0.15 | -310.59 | -0.61      |
| *NNH              | -314.24 | 0.52 | 0.16 | -313.88 | -0.62      |
| *NNH <sub>2</sub> | -317.76 | 0.83 | 0.16 | -317.09 | -0.55      |
| *N                | -303.65 | 0.12 | 0.03 | -303.57 | -2.55      |
| *NH               | -306.95 | 0.37 | 0.12 | -306.70 | -2.39      |
| *NH <sub>2</sub>  | -311.97 | 0.73 | 0.09 | -311.33 | -3.73      |
| *NH <sub>3</sub>  | -313.37 | 1.05 | 0.11 | -312.43 | -1.55      |

#### Alternating pathway on $B_1@MoS_2$

| Reaction | Energy | ZPE | TS | G | $\Delta G$ |
|----------|--------|-----|----|---|------------|
|----------|--------|-----|----|---|------------|

| step                             |         |      |      |         |       |
|----------------------------------|---------|------|------|---------|-------|
| *N <sub>2</sub>                  | -579.91 | 0.22 | 0.13 | -579.82 | -0.01 |
| *NNH                             | -583.41 | 0.52 | 0.14 | -583.03 | 0.07  |
| *NHNH                            | -587.28 | 0.85 | 0.14 | -586.56 | -0.18 |
| *NHNH <sub>2</sub>               | -592.06 | 1.18 | 0.18 | -591.01 | -1.35 |
| *NH <sub>2</sub> NH <sub>2</sub> | -594.60 | 1.53 | 0.17 | -593.24 | -0.29 |
| *NH <sub>2</sub>                 | -581.12 | 0.74 | 0.07 | -580.46 | -3.03 |
| *NH <sub>3</sub>                 | -583.69 | 1.09 | 0.09 | -582.69 | -1.97 |

#### Distal pathway on B<sub>1</sub>@MoS<sub>2</sub>

| Reaction step     | Energy  | ZPE  | TS    | G       | ΔG    |
|-------------------|---------|------|-------|---------|-------|
| *N <sub>2</sub>   | -579.91 | 0.22 | 0.13  | -579.82 | -0.01 |
| *NNH              | -583.41 | 0.52 | 0.14  | -583.03 | 0.07  |
| *NNH <sub>2</sub> | -587.23 | 0.57 | 0.09  | -586.76 | -0.38 |
| *N                | -571.60 | 0.08 | 0.09  | -571.60 | -0.74 |
| *NH               | -576.62 | 0.28 | 0.002 | -576.35 | -2.20 |
| *NH <sub>2</sub>  | -581.12 | 0.74 | 0.07  | -580.46 | -3.02 |
| *NH <sub>3</sub>  | -583.69 | 1.09 | 0.09  | -582.69 | -1.97 |

**Table S2.** Energy, ZPE, TS, G and ΔG of reaction steps of NRR on B<sub>1</sub>@graphene and B<sub>1</sub>@g-C<sub>3</sub>N<sub>4</sub> along alternating, distal and enzymatic pathway.

#### Alternating NRR pathway on B<sub>1</sub>@graphene

| Reaction step                    | Energy  | ZPE  | TS   | G       | ΔG    |
|----------------------------------|---------|------|------|---------|-------|
| *N <sub>2</sub>                  | -483.26 | 0.21 | 0.15 | -483.20 | -1.41 |
| *NNH                             | -487.19 | 0.52 | 0.15 | -486.82 | -1.76 |
| *NHNH                            | -490.23 | 0.82 | 0.17 | -489.58 | -1.23 |
| *NHNH <sub>2</sub>               | -495.31 | 1.18 | 0.21 | -494.34 | -2.71 |
| *NH <sub>2</sub> NH <sub>2</sub> | -497.36 | 1.51 | 0.14 | -495.99 | -1.07 |
| *NH <sub>2</sub>                 | -484.39 | 0.73 | 0.09 | -483.75 | -4.35 |
| *NH <sub>3</sub>                 | -486.46 | 1.07 | 0.10 | -485.49 | -2.80 |

#### Distal Pathway on B<sub>1</sub>@graphene

| Reaction step     | Energy  | ZPE  | TS   | G       | ΔG    |
|-------------------|---------|------|------|---------|-------|
| *N <sub>2</sub>   | -483.26 | 0.21 | 0.15 | -483.20 | -1.41 |
| *NNH              | -487.19 | 0.52 | 0.15 | -486.82 | -1.76 |
| *NNH <sub>2</sub> | -491.36 | 0.80 | 0.15 | -490.70 | -2.35 |
| *N                | -474.79 | 0.08 | 0.09 | -474.79 | -1.96 |
| *NH               | -480.48 | 0.38 | 0.10 | -480.19 | -4.07 |
| *NH <sub>2</sub>  | -484.39 | 0.73 | 0.09 | -483.75 | -4.35 |
| *NH <sub>3</sub>  | -486.46 | 1.07 | 0.10 | -485.49 | -2.80 |

#### Enzymatic pathway on B<sub>1</sub>@graphene

| Reaction step                    | Energy  | ZPE  | TS   | G       | $\Delta G$ |
|----------------------------------|---------|------|------|---------|------------|
| *N <sub>2</sub>                  | -482.99 | 0.20 | 0.13 | -482.92 | -1.14      |
| *NNH                             | -486.61 | 0.47 | 0.15 | -486.29 | -1.22      |
| *NHNH                            | -491.40 | 0.81 | 0.16 | -490.76 | -2.41      |
| *NHNH <sub>2</sub>               | -495.01 | 1.18 | 0.14 | -493.97 | -2.33      |
| *NH <sub>2</sub> NH <sub>2</sub> | -502.73 | 1.45 | 0.18 | -501.46 | -6.54      |
| *NH <sub>2</sub>                 | -484.40 | 0.73 | 0.09 | -483.75 | -4.35      |
| *NH <sub>3</sub>                 | -486.46 | 1.06 | 0.11 | -485.50 | -2.82      |

#### Alternating pathway on B<sub>1</sub>@g-C<sub>3</sub>N<sub>4</sub>

| Reaction step                    | Energy  | ZPE  | TS   | G       | $\Delta G$ |
|----------------------------------|---------|------|------|---------|------------|
| *N <sub>2</sub>                  | -497.56 | 0.23 | 0.11 | -497.44 | -2.63      |
| *NNH                             | -500.92 | 0.51 | 0.13 | -500.54 | -2.45      |
| *NHNH                            | -505.25 | 0.86 | 0.11 | -504.50 | -3.13      |
| *NHNH <sub>2</sub>               | -509.99 | 1.20 | 0.12 | -508.91 | -4.25      |
| *NH <sub>2</sub> NH <sub>2</sub> | -512.68 | 1.52 | 0.12 | -511.28 | -3.33      |
| *NH <sub>2</sub>                 | -499.14 | 0.74 | 0.06 | -498.45 | -6.03      |
| *NH <sub>3</sub>                 | -502.06 | 1.04 | 0.06 | -501.08 | -5.38      |

#### Distal pathway on B<sub>1</sub>@g-C<sub>3</sub>N<sub>4</sub>

| Reaction step     | Energy  | ZPE   | TS   | G       | $\Delta G$ |
|-------------------|---------|-------|------|---------|------------|
| *N <sub>2</sub>   | -497.56 | 0.23  | 0.11 | -497.44 | -2.63      |
| *NNH              | -500.92 | 0.51  | 0.13 | -500.54 | -2.45      |
| *NNH <sub>2</sub> |         |       |      |         | -3.35      |
|                   | -505.44 | 0.85  | 0.13 | -504.72 |            |
| *N                | -488.26 | 0.084 | 0.06 | -488.23 | -2.38      |
| *NH               | -494.03 | 0.39  | 0.06 | -493.69 | -4.55      |
| *NH <sub>2</sub>  | -499.14 | 0.75  | 0.06 | -498.45 | -6.03      |
| *NH <sub>3</sub>  | -502.06 | 1.04  | 0.06 | -501.08 | -5.38      |

#### Enzymatic pathway on B<sub>1</sub>@g-C<sub>3</sub>N<sub>4</sub>

| Reaction step                    | Energy  | ZPE  | TS   | G       | $\Delta G$ |
|----------------------------------|---------|------|------|---------|------------|
| *N <sub>2</sub>                  | -497.42 | 0.21 | 0.10 | -497.30 | -2.50      |
| *NNH                             | -500.50 | 0.48 | 0.12 | -500.14 | -2.05      |
| *NHNH                            | -505.41 | 0.85 | 0.10 | -504.66 | -3.29      |
| *NHNH <sub>2</sub>               | -509.24 | 1.19 | 0.11 | -508.17 | -3.51      |
| *NH <sub>2</sub> NH <sub>2</sub> | -515.37 | 1.46 | 0.15 | -514.06 | -6.12      |
| *NH <sub>2</sub>                 | -499.14 | 0.74 | 0.06 | -498.45 | -6.03      |
| *NH <sub>3</sub>                 | -502.05 | 1.04 | 0.06 | -501.08 | -5.37      |

**Table S3.** Energy, ZPE, TS, G and  $\Delta G$  of reaction steps of NRR on B<sub>2</sub>@MoS<sub>2</sub> and B<sub>2</sub>@graphyne along alternating, and distal pathway.

**Alternating pathway on B<sub>2</sub>@MoS<sub>2</sub>**

| Reaction step                    | Energy  | ZPE  | TS       | G       | $\Delta G$ |
|----------------------------------|---------|------|----------|---------|------------|
| *N <sub>2</sub>                  | -585.48 | 0.22 | 0.151758 | -585.41 | -2.07      |
| *NNH                             | -588.72 | 0.49 | 0.183362 | -588.41 | -1.79      |
| *NHNH                            | -592.13 | 0.85 | 0.18366  | -591.47 | -1.56      |
| *NHNH <sub>2</sub>               | -596.68 | 1.16 | 0.215264 | -595.74 | -2.55      |
| *NH <sub>2</sub> NH <sub>2</sub> | -599.70 | 1.53 | 0.196183 | -598.37 | -1.89      |
| *NH <sub>2</sub>                 | -585.79 | 0.69 | 0.145497 | -585.24 | -4.28      |
| *NH <sub>3</sub>                 | -588.65 | 1.07 | 0.121049 | -587.70 | -3.45      |

**Distal pathway on B<sub>2</sub>@MoS<sub>2</sub>**

| Reaction step     | Energy  | ZPE  | TS   | G       | $\Delta G$ |
|-------------------|---------|------|------|---------|------------|
| *N <sub>2</sub>   | -585.48 | 0.22 | 0.15 | -585.41 | -2.07      |
| *NNH              | -588.72 | 0.49 | 0.18 | -588.41 | -1.79      |
| *NNH <sub>2</sub> | -592.80 | 0.83 | 0.14 | -592.11 | -2.20      |
| *N                | -575.93 | 0.08 | 0.10 | -575.95 | -1.55      |
| *NH               | -581.75 | 0.38 | 0.10 | -581.48 | -3.80      |
| *NH <sub>2</sub>  | -585.79 | 0.69 | 0.15 | -585.24 | -4.28      |
| *NH <sub>3</sub>  | -588.65 | 1.07 | 0.12 | -587.70 | -3.45      |

**Alternating pathway on B<sub>2</sub>@graphyne**

| Reaction step                    | Energy  | ZPE  | TS   | G       | $\Delta G$ |
|----------------------------------|---------|------|------|---------|------------|
| *N <sub>2</sub>                  | -442.16 | 0.23 | 0.14 | -442.07 | -0.66      |
| *NNH                             | -444.91 | 0.52 | 0.15 | -444.55 | 0.15       |
| *NHNH                            | -449.12 | 0.88 | 0.14 | -448.38 | -0.40      |
| *NHNH <sub>2</sub>               | -453.51 | 1.18 | 0.18 | -452.52 | -1.25      |
| *NH <sub>2</sub> NH <sub>2</sub> | -456.88 | 1.53 | 0.20 | -455.55 | -1.00      |
| *NH <sub>2</sub>                 | -442.56 | 0.74 | 0.08 | -441.89 | -2.86      |
| *NH <sub>3</sub>                 | -445.94 | 1.07 | 0.15 | -444.98 | -2.67      |

**Distal pathway on B<sub>2</sub>@graphyne**

| Reaction step     | Energy  | ZPE  | TS   | G       | $\Delta G$ |
|-------------------|---------|------|------|---------|------------|
| *N <sub>2</sub>   | -442.16 | 0.23 | 0.14 | -442.07 | -0.66      |
| *NNH              | -444.91 | 0.52 | 0.15 | -444.55 | 0.15       |
| *NNH <sub>2</sub> | -449.13 | 0.85 | 0.14 | -448.13 | -0.15      |
| *N                | -432.01 | 0.08 | 0.08 | -431.85 | 0.62       |
| *NH               | -438.58 | 0.38 | 0.10 | -438.10 | -2.35      |
| *NH <sub>2</sub>  | -442.56 | 0.74 | 0.08 | -441.89 | -2.86      |
| *NH <sub>3</sub>  | -445.94 | 1.07 | 0.11 | -444.98 | -2.67      |

**Table S4.** Energy, ZPE, TS, G and  $\Delta G$  of reaction steps of NRR on  $B_2@g-C_3N_4$  along Enzymatic pathway.

**Enzymatic pathway on  $B_2@g-C_3N_4$**

| Reaction step                    | Energy  | ZPE  | TS   | G       | $\Delta G$ |
|----------------------------------|---------|------|------|---------|------------|
| *N <sub>2</sub>                  | -504.25 | 0.22 | 0.07 | -504.11 | -1.60      |
| *NNH                             | -508.43 | 0.54 | 0.08 | -507.97 | -2.18      |
| *NHNH                            | -512.90 | 0.86 | 0.08 | -512.12 | -3.04      |
| *NHNH <sub>2</sub>               | -516.59 | 1.21 | 0.10 | -515.48 | -3.12      |
| *NH <sub>2</sub> NH <sub>2</sub> | -522.07 | 1.45 | 0.14 | -520.75 | -5.11      |
| *NH <sub>2</sub>                 | -505.59 | 0.75 | 0.05 | -504.88 | -4.75      |
| *NH <sub>3</sub>                 | -508.51 | 0.95 | 0.27 | -507.83 | -4.42      |

**Table S5.** Energy, ZPE, TS, G and  $\Delta G$  of reaction steps of NRR on  $B_2@graphene$  along alternating, distal and enzymatic pathway.

**Alternating pathway on  $B_2@graphene$**

| Reaction step                    | Energy  | ZPE  | TS   | G       | $\Delta G$ |
|----------------------------------|---------|------|------|---------|------------|
| *N <sub>2</sub>                  | -488.76 | 0.22 | 0.09 | -488.63 | -2.29      |
| *NNH                             | -492.28 | 0.50 | 0.17 | -491.95 | -2.32      |
| *NHNH                            | -495.58 | 0.84 | 0.18 | -494.91 | -2.00      |
| *NHNH <sub>2</sub>               | -500.06 | 1.16 | 0.21 | -499.10 | -2.90      |
| *NH <sub>2</sub> NH <sub>2</sub> | -502.57 | 1.51 | 0.19 | -501.25 | -1.76      |
| *NH <sub>2</sub>                 | -489.20 | 0.68 | 0.10 | -488.62 | -4.65      |
| *NH <sub>3</sub>                 | -491.45 | 1.07 | 0.10 | -490.48 | -3.23      |

**Distal pathway on  $B_2@graphene$**

| Reaction step     | Energy  | ZPE  | TS   | G       | $\Delta G$ |
|-------------------|---------|------|------|---------|------------|
| *N <sub>2</sub>   | -488.76 | 0.22 | 0.09 | -488.63 | -2.29      |
| *NNH              | -492.28 | 0.50 | 0.17 | -491.95 | -2.32      |
| *NNH <sub>2</sub> | -496.68 | 0.85 | 0.18 | -496.01 | -3.10      |
| *N                | -479.81 | 0.08 | 0.11 | -479.85 | -2.45      |
| *NH               | -485.49 | 0.38 | 0.09 | -485.20 | -4.52      |
| *NH <sub>2</sub>  | -489.20 | 0.68 | 0.10 | -488.62 | -4.65      |
| *NH <sub>3</sub>  | -491.45 | 1.07 | 0.10 | -490.48 | -3.23      |

**Enzymatic pathway on  $B_2@graphene$**

| Reaction step                    | Energy  | ZPE  | TS   | G       | $\Delta G$ |
|----------------------------------|---------|------|------|---------|------------|
| *N <sub>2</sub>                  | -488.36 | 0.20 | 0.14 | -488.31 | -1.96      |
| *NNH                             | -491.63 | 0.48 | 0.15 | -491.31 | -1.68      |
| *NHNH                            | -496.33 | 0.82 | 0.15 | -495.68 | -2.75      |
| *NHNH <sub>2</sub>               | -499.91 | 1.16 | 0.20 | -499.05 | -2.85      |
| *NH <sub>2</sub> NH <sub>2</sub> | -507.35 | 1.44 | 0.19 | -506.10 | -6.62      |
| *NH <sub>2</sub>                 | -489.21 | 0.70 | 0.12 | -488.63 | -4.66      |
| *NH <sub>3</sub>                 | -491.10 | 1.05 | 0.14 | -490.19 | -2.94      |

**Table S6.** Energy, ZPE, TS, G and  $\Delta G$  of reaction steps of NRR on B<sub>1</sub>@graphene, B<sub>2</sub>@graphene, B<sub>1</sub>@g-C<sub>3</sub>N<sub>4</sub> and B<sub>2</sub>@g-C<sub>3</sub>N<sub>4</sub> catalysts along consecutive pathway.

#### Consecutive pathway on B<sub>1</sub>@graphene

| Reaction step     | Energy  | ZPE  | TS   | G       | $\Delta G$ |
|-------------------|---------|------|------|---------|------------|
| *N <sub>2</sub>   | -482.99 | 0.20 | 0.13 | -482.92 | -1.14      |
| *NNH              | -486.61 | 0.47 | 0.15 | -486.29 | -1.22      |
| *NNH <sub>2</sub> | -491.28 | 0.85 | 0.15 | -490.57 | -2.22      |
| *N                | -474.80 | 0.08 | 0.09 | -474.81 | -1.97      |
| *NH               | -480.47 | 0.38 | 0.10 | -480.18 | -4.07      |
| *NH <sub>2</sub>  | -484.40 | 0.73 | 0.09 | -483.75 | -4.35      |
| *NH <sub>3</sub>  | -486.46 | 1.06 | 0.11 | -485.50 | -2.82      |

#### Consecutive pathway on B<sub>2</sub>@graphene

| Reaction step     | Energy  | ZPE  | TS   | G       | $\Delta G$ |
|-------------------|---------|------|------|---------|------------|
| *N <sub>2</sub>   | -488.36 | 0.20 | 0.14 | -488.31 | -1.96      |
| *NNH              | -491.63 | 0.48 | 0.15 | -491.31 | -1.68      |
| *NNH <sub>2</sub> | -496.12 | 0.85 | 0.16 | -495.43 | -2.52      |
| *N                | -479.82 | 0.08 | 0.11 | -479.85 | -2.45      |
| *NH               | -485.49 | 0.38 | 0.09 | -485.20 | -4.52      |
| *NH <sub>2</sub>  | -489.21 | 0.70 | 0.12 | -488.63 | -4.66      |
| *NH <sub>3</sub>  | -491.10 | 1.05 | 0.14 | -490.19 | -2.94      |

#### Consecutive pathway on B<sub>1</sub>@g-C<sub>3</sub>N<sub>4</sub>

| Reaction step     | Energy  | ZPE  | TS   | G       | $\Delta G$ |
|-------------------|---------|------|------|---------|------------|
| *N <sub>2</sub>   | -497.42 | 0.21 | 0.10 | -497.30 | -2.50      |
| *NNH              | -500.50 | 0.48 | 0.12 | -500.14 | -2.05      |
| *NNH <sub>2</sub> | -504.37 | 0.84 | 0.11 | -503.64 | -2.26      |
| *N                | -488.12 | 0.08 | 0.07 | -488.11 | -2.25      |
| *NH               | -494.05 | 0.40 | 0.06 | -493.71 | -4.57      |
| *NH <sub>2</sub>  | -499.14 | 0.74 | 0.06 | -498.45 | -6.03      |
| *NH <sub>3</sub>  | -502.05 | 1.04 | 0.06 | -501.08 | -5.37      |

**Consecutive pathway on B<sub>2</sub>@g-C<sub>3</sub>N<sub>4</sub>**

| <b>Reaction step</b> | <b>Energy</b> | <b>ZPE</b> | <b>TS</b> | <b>G</b> | <b>ΔG</b> |
|----------------------|---------------|------------|-----------|----------|-----------|
| *N <sub>2</sub>      | -504.25       | 0.22       | 0.07      | -504.11  | -1.60     |
| *NNH                 | -508.43       | 0.54       | 0.08      | -507.97  | -2.18     |
| *NNH <sub>2</sub>    | -511.78       | 0.87       | 0.09      | -511.00  | -1.92     |
| *N                   | -498.57       | 0.14       | 0.02      | -498.45  | -4.89     |
| *NH                  | -502.75       | 0.45       | 0.02      | -502.32  | -5.47     |
| *NH <sub>2</sub>     | -505.59       | 0.75       | 0.05      | -504.88  | -4.75     |
| *NH <sub>3</sub>     | -508.51       | 0.95       | 0.27      | -507.83  | -4.42     |
